# Supplementary material for: Transcriptomic Profiling of Virus-Host Cell Interactions following Chicken Anaemia Virus (CAV) Infection in an In Vivo Model
Source: PLoS One. 2015 Aug 5;10(8):e0134866. doi: 10.1371/journal.pone.0134866 (PMC4526643; doi:10.1371/journal.pone.0134866)
Supplement: S2 File — (XLS) [file pone.0134866.s002.xls]

## Sheet: Thymus
Supplementary Table 2 - Genes differentially regulated between control and CAV-infected birds at 14 dpi
Thymus
Genbank	ARKcloneID	Unigene ID	Gene symbol	Gene Name	FoldChange	FDR
AM071791	C0000222n17	Gga.29358	ALKBH8	Alkylated DNA repair protein alkB homolog 8	8.41284	0.00399623
BU398082	603534767F1	Gga.38000	IGHV	PREDICTED: ig heavy chain V-III region VH26-like [M. gallopavo]	8.03664	0.00615801
AM066667	C0000468p11	Gga.31942	MALT1	Mucosa associated lymphoid tissue lymphoma translocation gene 1	7.35934	0.0077198
AM064723	C0000360e09	Gga.2467	IGJ	Immunoglobulin j polypeptide, linker protein for immunoglobulin alpha and mu polypeptides	4.84525	0.00417056
AM071571	C0000222c16	Gga.42042	IgG-H	IgG H-chain (HC36) D-J-C	4.55033	0.00265514
AM071789	C0000222n15	Gga.38	LV1L2	PREDICTED: ig lambda chain V-1 region-like, partial [M. gallopavo]	4.36094	0.0121067
AM071930	CHK02000039e10	Gga.4330	IGHM	Mu immunoglobulin heavy chain C region	4.16732	0.00265514
AM072032	CHK02000039j03	Gga.38	LV1L2	PREDICTED: ig lambda chain V-1 region-like, partial [M. gallopavo]	3.82844	0.00399623
AM067164	C0000473j02	Gga.4682	UNG	Uracil-dna glycosylase	3.81975	0.0214976
AM072138	CHK02000039n20	Gga.4330	IGHM	Mu immunoglobulin heavy chain C region	3.51056	0.011549
AM072203	10P02	Gga.32215	LEP	Similar to leptin precursor [Bos taurus]	3.05022	0.002574
AM066150	C0000467g20	Gga.37856	IGHA1	IgA H=immunoglobulin alpha heavy chain	2.95213	0.0260132
AM067556	C0000474l15	Gga.5236	CWC15	CWC15 - spliceosome-associated protein homolog (S. cerevisiae)	2.82884	0.0559786
AM065666	C0000464p04	Gga.3994	FN1	Fibronectin 1	2.63461	0.00417056
AM067376	C0000474d01	Gga.12358	CCDC50	Coiled-coil domain containing 50	2.61456	0.013642
AM072194	10G09	Gga.6968	COPE	Coatomer protein complex, subunit epsilon	2.60088	0.0437008
AM067797	C0000476g24	Gga.4330	IGHM	Mu immunoglobulin heavy chain C region	2.53564	0.0359168
AM064759	C0000360f23	Gga.156	NBL1	Neuroblastoma, suppression of tumorigenicity 1	2.38365	0.00399623
AM071903	CHK02000039d02	Gga.3659	NFE2L2	Nuclear factor (erythroid-derived 2)-like 2	2.13276	0.0214976
AM071549	C0000222b11	Gga.8020	CYSTM1	Chromosome 13 open reading frame, human C5orf32	1.98766	0.0262769
AM070972	C0000798p09	Gga.22978	BAK1	BCL2-antagonist/killer 1	1.72593	0.0332118
AM063708	UEB603581089A24	Gga.39155	COX6A1	Cytochrome c oxidase subunit VIa polypeptide 1	-1.64341	0.0425574
AM067220	C0000473l18	Gga.7611		No hit	-1.81254	0.0359168
AM070536	C0001684D18	Gga.46420		Transcribed locus, moderately similar to XP_002188550.1 PREDICTED: hypothetical protein [Taeniopygia guttata]	-1.84654	0.0359168
AM069990	C0000878m17	Gga.19963		No hit	-1.86418	0.0245191
AM064579	C0000922E15	Gga.7005	DDT	D-dopachrome tautomerase	-1.9504	0.0262769
AM070400	C0000892p10	Gga.5708	C12H9orf89	Chromosome 12 open reading frame, human C9orf89	-1.99796	0.0436358
AM069364	C0000874n21	Gga.28443	GRAP2	GRB2-related adaptor protein 2	-2.05942	0.036118
AM063950	C0000856d24	Gga.35084	LOC100858191	Uncharacterized	-2.06993	0.0104416
AM065455	C0000464f18	Gga.39153	ACOX1	Acyl-CoA oxidase 1, palmitoyl	-2.11049	0.00781392
AM070183	C0000892f18	Gga.575	CD8A	CD8 alpha molecule	-2.11251	0.0200944
AM070215	C0000892h02	Gga.8655	DOCK11	Similar to dedicator of cytokinesis 11	-2.14394	0.0359168
AM069891	C0000878h17	Gga.18926	PTP4A3	Protein tyrosine phosphatase type IVA, isoform 1	-2.4132	0.011196
AM066098	C0000467e07	Gga.27362		No hit	-2.44339	0.00534075
AM067302	C0000473p09		ZC3H7B	PREDICTED: Gallus gallus zinc finger CCCH-type containing 7B (ZC3H7B), transcript variant X7	-2.54868	0.0349921
AM070876	C0000798k17	Gga.40897	CD2	T cell surface antigen CD2	-2.58379	0.00866821
AM068472	C0000869f02	Gga.575	Cd8a	CD8 antigen alpha polypeptide precursor	-2.79121	0.002574
CR352819	C0000798d22	Gga.13105		No hit	-2.84339	0.00248418
AM070038	C0000878o24	Gga.11417	SATB1	SATB homeobox 1	-3.23327	0.00417056
AM064025	C0000856i08	Gga.8508	SLA	Src-like-adaptor	-3.52085	0.00026901

## Sheet: Bone Marrow
Bone marrow
Genbank	ARKcloneID	Unigene ID	Gene symbol	Gene Name	FoldChange	FDR
AM071789	C0000222n15	Gga.38	LV1L2	PREDICTED: ig lambda chain V-1 region-like, partial [M. gallopavo]	6.87862	0.127828
AM071791	C0000222n17	Gga.29358	ALKBH8	Alkylated DNA repair protein alkB homolog 8	6.34648	0.148612
AM066667	C0000468p11	Gga.31942	MALT1	Mucosa associated lymphoid tissue lymphoma translocation gene 1	4.11259	0.151176
AM064859	C0000360k12	Gga.3391	KRT15	Keratin 15	3.76887	0.148612
AM067164	C0000473j02	Gga.4682	UNG	Uracil-dna glycosylase	3.12756	0.0498183
AM072203	10P02	Gga.32215	LEP	Similar to leptin precursor [Bos taurus]	2.64376	0.148612
AM072194	10G09	Gga.6968	COPE	Coatomer protein complex, subunit epsilon	2.4659	0.161067
AM069876	C0000878g24	Gga.25854	NOP16	PREDICTED: nucleolar protein 16-like [Meleagris gallopavo]	1.95276	0.148612
AM067797	C0000467g24	Gga.4330	IGHM	Mu immunoglobulin heavy chain C region	-1.60788	0.161067
AM067620	C0000474o23	Gga.7989	PLEK2	Pleckstrin 2	-1.87094	0.133502
AM071813	C0000222o21	Gga.4777	LOC100859882	Uncharacterized	-1.9318	0.148612
AM066420	C0000468e08		LOC101750766	PREDICTED: Gallus gallus uncharacterized LOC101750766	-2.3137	0.148612
AM064849	C0000360j24	Gga.48727	MMP9	Matrix metallopeptidase 9 (gelatinase B, 92kDa gelatinase, 92kDa type IV collagenase)	-2.56564	0.161067
AM069912	C0000878i16	Gga.23686	SIX2	SIX homeobox 2	-3.36893	0.148612

## Sheet: Spleen
Spleen
Genbank	ARKcloneID	Unigene ID	Gene symbol	Gene Name	FoldChange	FDR
AM066667	C0000468p11	Gga.31942	MALT1	Mucosa associated lymphoid tissue lymphoma translocation gene 1	4.36336	0.0155674
AM064834	C0000360j07	Gga.6941	AKAP13	A kinase (PRKA) anchor protein 13	2.55968	0.187323
AM066230	C0000467k21	Gga.11604	FDPS	Farnesyl pyrophosphate synthase	1.96696	0.0509138
AM066557	C0000468k09	Gga.48066	HOXB3	Similar to homeobox protein Hox-B3	1.79944	0.134212
AM063191	BET603945470K18	Gga.6330	RNF7	Ring finger protein 7	-1.56176	0.19394
AM071013	C0000853b07	Gga.20064	UNC119B	Unc-119 homolog B (C. elegans)	-1.56589	0.191358
AM070116	C0000892c16	Gga.3568	NXT2	Nuclear transport factor 2-like export factor 2	-1.63905	0.187323
AM066702	C0000643D22	Gga.26298	KLHL12	PREDICTED: similar to kelch-like 12 (Drosophila) [Taeniopygia guttata]	-1.73701	0.19394
AM064701	C0000360d09	Gga.5672	ACBD5	Acyl-Coenzyme A binding domain containing 5	-1.78463	0.19394
AM070150	C0000892e03		LOC100859824	PREDICTED: Gallus gallus NIPA-like protein 2-like	-2.25909	0.19394
AM072034	CHK02000039j05	Gga.3169	CDCA3	Cell division cycle associated 3	-2.28891	0.121512
AM063942	C0000856d14			No hit	-2.45563	0.105945
AM066124	C0000467f13	Gga.9923	SRSF2	Serine/arginine-rich splicing factor 2	-2.55709	0.187323
